# Supplementary material
Source: publisher figshare collection journal article supplement (https://acs.figshare.com/ndownloader/files/5898270)
Supplement: Supplementary file 1 [file 5898270]

Supporting Information for:

Correlations of Nitrenium Ion Selectivities with Quantitative Mutagenicity  
and Carcinogenicity of the Corresponding Amines

Michael Novak and Sridharan Rajagopal

Miami University  
Oxford, OH 45056  
Phone: 513-529-2813  
Fax: 513-529-5715  
E-Mail: novakm@muohio.edu

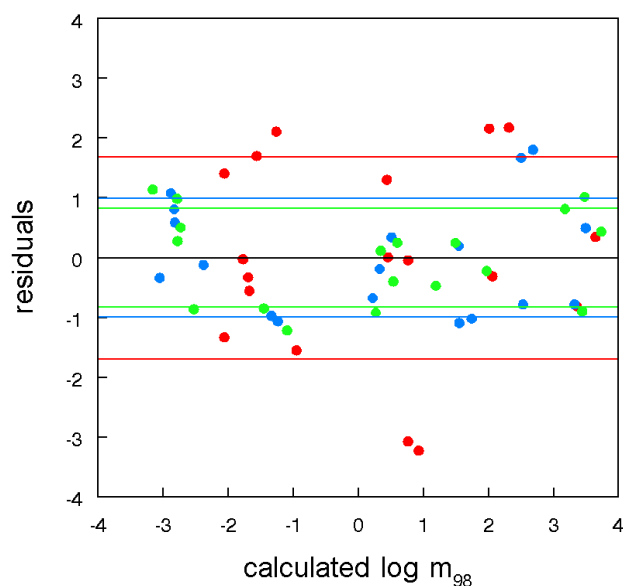

Plot of residuals vs. calculated value of  $\log m_{98}$  for single variable regression against  $\log S$  (●), multiple variable regression against  $\log S$  and  $I_{\text{rings}}$  (●), and multiple variable regression against  $\log S$ ,  $I_{\text{rings}}$ , and  $\text{Clog P}$  (●). The color-coded horizontal lines are the square roots of the mean square error (RMSE) for the three cases.

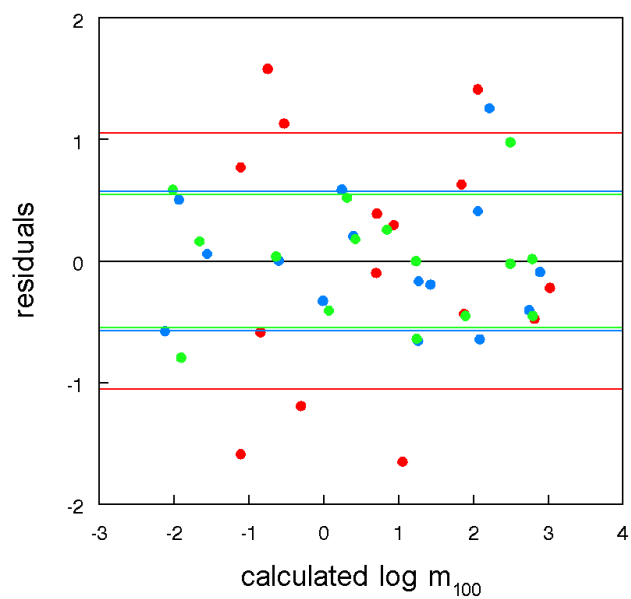

Plot of residuals vs. calculated value of  $\log m_{100}$  for single variable regression against  $\log S$  (●), multiple variable regression against  $\log S$  and  $I_{\text{rings}}$  (●), and multiple variable regression against  $\log S$ ,  $I_{\text{rings}}$ , and  $\text{Clog } P$  (●). The color-coded horizontal lines are the square roots of the mean square error (RMSE) for the three cases.
